# Supplementary material for: Efficacy comparison of multi-phase CT and hepatotropic contrast-enhanced MRI in the differential diagnosis of focal nodular hyperplasia: a prospective cohort study
Source: Springer Nature journal article supplement (doi:10.1186/s12876-017-0719-1), 2018-01-15
Supplement: MOESM5 [file 15365528]

Additional file 5. Results of multiple comparisons of radiological signs in CT by means of McNemar's test. *P* values presented after Bonferroni-Hochberg's correction.

|                                       | enhancement in HAP and presence of CS | enhancement in HAP and PVP | enhancement in HAP and PVP after exclusion of cirrhotic pts. |
|---------------------------------------|---------------------------------------|----------------------------|--------------------------------------------------------------|
| presence of CS                        | 0.134                                 | <b>0.0072</b>              | 0.054                                                        |
| enhancement in HAP and presence of CS |                                       | <b>0.0006</b>              | <b>0.006</b>                                                 |
| enhancement in HAP and PVP            |                                       |                            | 0.0824                                                       |

CS – central scar, HAP – hepatic arterial phase, pts – patients, PVP – portal venous phase.
