# Supplementary material for: Efficacy comparison of multi-phase CT and hepatotropic contrast-enhanced MRI in the differential diagnosis of focal nodular hyperplasia: a prospective cohort study
Source: Springer Nature journal article supplement (doi:10.1186/s12876-017-0719-1), 2018-01-15
Supplement: MOESM6 [file 15365528]

Additional file 6. Results of multiple comparisons of radiological signs in MRI by means of McNemar's test. *P* values presented after Bonferroni-Hochberg's correction.

|                                                      | enhancement in HAP and HBP | enhancement in HAP and HBP and presence of CS | enhancement in HBP after exclusion of cirrhotic pts. | enhancement in HAP and HBP after exclusion of cirrhotic pts |
|------------------------------------------------------|----------------------------|-----------------------------------------------|------------------------------------------------------|-------------------------------------------------------------|
| enhancement in HBP                                   | <b>0.0002</b>              | <b>&lt;0.0001</b>                             | <b>0.0002</b>                                        | <b>&lt;0.0001</b>                                           |
| enhancement in HAP and HBP                           |                            | <b>&lt;0.0001</b>                             | 0.8137                                               | <b>0.0096</b>                                               |
| enhancement in HAP and HBP and presence of CS        |                            |                                               | <b>&lt;0.0001</b>                                    | <b>0.0037</b>                                               |
| enhancement in HBP after exclusion of cirrhotic pts. |                            |                                               |                                                      | <b>0.0148</b>                                               |

CS – central scar, HAP – hepatic arterial phase, HBP – hepatobiliary phase, pts – patients.
